# Supplementary material for: Incidence energy dependent state-to-state time-of-flight measurements of NO(v = 3) collisions with Au(111): the fate of incidence vibrational and translational energy
Source: Royal Society of Chemistry journal article supplement (doi:10.1039/c3cp55224a), 2014-01-01
Supplement: c3cp55224a1.pdf [file c3cp55224a1.pdf]

## Supplementary material

We present the fit results to the  $E_l$  dependent state-to-state time-of-flight measurements. We represent the velocity distribution by a flowing Maxwell-Boltzmann distribution,  $\varphi_f(s, s_i) = A \cdot s^3 \exp[-(s - \gamma s_i)^2 / \alpha^2]$ . It well characterized by only the decrease  $\gamma$  of the incident velocity  $s_i$  and a width parameter  $\alpha$ . The parameter A only scales the fit function to the amplitude of the dataset and is not shown here.  $\varphi_f(s, s_i)$  can be converted into energy space using the appropriate Jacobian,  $P(E_f) = \varphi_f(\sqrt{2E_f/m}, s_i) / \sqrt{2mE_f}$ . The mean translational energies are calculated using

$$\langle E_f \rangle = \int_0^{\infty} E_f P(E_f) dE_f$$

$$\langle E_l \rangle = 0.11 \text{ eV}, v_i=3, J_i=1.5:$$

| $v_f$ | $J_f$ | $\gamma$ | $\alpha$ (m/s) | $\langle E_f \rangle$ (eV) | FWHM (eV) |
|-------|-------|----------|----------------|----------------------------|-----------|
| 3     | 3.5   | 0.500    | 292            | 0.073                      | 0.081     |
| 3     | 5.5   | 0.473    | 315            | 0.075                      | 0.086     |
| 3     | 9.5   | 0.384    | 343            | 0.072                      | 0.085     |
| 3     | 10.5  | 0.437    | 316            | 0.071                      | 0.082     |
| 3     | 12.5  | 0.380    | 325            | 0.066                      | 0.078     |
| 3     | 14.5  | 0.366    | 317            | 0.062                      | 0.074     |
| 3     | 16.5  | 0.269    | 347            | 0.060                      | 0.072     |
| 2     | 3.5   | 0.005    | 514            | 0.083                      | 0.101     |
| 2     | 5.5   | 0.060    | 495            | 0.082                      | 0.101     |
| 2     | 10.5  | 0.257    | 423            | 0.080                      | 0.098     |
| 2     | 14.5  | 0.003    | 484            | 0.073                      | 0.090     |
| 2     | 16.5  | 0.003    | 465            | 0.068                      | 0.083     |
| 2     | 18.5  | 0.174    | 455            | 0.081                      | 0.100     |
| 1     | 5.5   | 0.003    | 476            | 0.071                      | 0.087     |
| 1     | 11.5  | 0.008    | 465            | 0.068                      | 0.083     |
| 1     | 14.5  | 0.002    | 463            | 0.067                      | 0.082     |

$$\langle E_f \rangle = 0.26eV, \nu_i=3, J_i=1.5:$$

| $\nu_f$ | $J_f$ | $\gamma$ | $\alpha$ (m/s) | $\langle E_f \rangle$ (eV) | FWHM (eV) |
|---------|-------|----------|----------------|----------------------------|-----------|
| 3       | 3.5   | 0.635    | 339            | 0.166                      | 0.157     |
| 3       | 5.5   | 0.645    | 337            | 0.168                      | 0.158     |
| 3       | 9.5   | 0.547    | 404            | 0.159                      | 0.171     |
| 3       | 10.5  | 0.612    | 348            | 0.161                      | 0.157     |
| 3       | 14.5  | 0.610    | 316            | 0.150                      | 0.140     |
| 3       | 16.5  | 0.571    | 333            | 0.143                      | 0.141     |
| 3       | 22.5  | 0.365    | 369            | 0.099                      | 0.114     |
| 3       | 26.5  | 0.385    | 322            | 0.089                      | 0.099     |
| 3       | 30.5  | 0.409    | 336            | 0.099                      | 0.109     |
| 3       | 32.5  | 0.406    | 373            | 0.110                      | 0.125     |
| 2       | 3.5   | 0.681    | 353            | 0.187                      | 0.1775    |
| 2       | 5.5   | 0.567    | 458            | 0.187                      | 0.206     |
| 2       | 10.5  | 0.599    | 397            | 0.174                      | 0.180     |
| 2       | 14.5  | 0.551    | 432            | 0.172                      | 0.187     |
| 2       | 16.5  | 0.554    | 411            | 0.165                      | 0.177     |
| 2       | 18.5  | 0.474    | 498            | 0.175                      | 0.203     |
| 2       | 22.5  | 0.511    | 437            | 0.161                      | 0.180     |
| 2       | 23.5  | 0.354    | 565            | 0.171                      | 0.207     |
| 2       | 28.5  | 0.003    | 677            | 0.143                      | 0.175     |
| 2       | 32.5  | 0.003    | 680            | 0.144                      | 0.176     |
| 1       | 5.5   | 0.753    | 317            | 0.203                      | 0.169     |
| 1       | 11.5  | 0.700    | 355            | 0.194                      | 0.180     |
| 1       | 14.5  | 0.558    | 443            | 0.178                      | 0.195     |
| 1       | 18.5  | 0.736    | 324            | 0.198                      | 0.170     |
| 1       | 19.5  | 0.674    | 392            | 0.198                      | 0.196     |
| 1       | 22.5  | 0.658    | 410            | 0.200                      | 0.202     |
| 1       | 28.5  | 0.668    | 434            | 0.213                      | 0.219     |
| 1       | 29.5  | 0.775    | 299            | 0.206                      | 0.163     |

$$\langle E_f \rangle = 0.39 eV, \nu_i=3, J_i=1.5:$$

| $\nu_f$ | $J_f$ | $\gamma$ | $\alpha$ (m/s) | $\langle E_f \rangle$ (eV) | FWHM (eV) |
|---------|-------|----------|----------------|----------------------------|-----------|
| 3       | 3.5   | 0.684    | 264            | 0.217                      | 0.151     |
| 3       | 5.5   | 0.712    | 248            | 0.228                      | 0.147     |
| 3       | 9.5   | 0.708    | 234            | 0.222                      | 0.138     |
| 3       | 10.5  | 0.649    | 281            | 0.204                      | 0.154     |
| 3       | 14.5  | 0.693    | 254            | 0.219                      | 0.147     |
| 3       | 16.5  | 0.683    | 250            | 0.213                      | 0.143     |
| 3       | 22.5  | 0.699    | 214            | 0.212                      | 0.124     |
| 3       | 26.5  | 0.582    | 255            | 0.164                      | 0.125     |
| 3       | 30.5  | 0.498    | 254            | 0.129                      | 0.108     |
| 3       | 32.5  | 0.523    | 246            | 0.137                      | 0.110     |
| 2       | 3.5   | 0.744    | 263            | 0.249                      | 0.163     |
| 2       | 5.5   | 0.734    | 270            | 0.246                      | 0.166     |
| 2       | 10.5  | 0.705    | 294            | 0.237                      | 0.174     |
| 2       | 14.5  | 0.698    | 288            | 0.231                      | 0.169     |
| 2       | 16.5  | 0.679    | 304            | 0.226                      | 0.175     |
| 2       | 18.5  | 0.735    | 268            | 0.246                      | 0.165     |
| 2       | 22.5  | 0.692    | 243            | 0.216                      | 0.140     |
| 2       | 23.5  | 0.707    | 264            | 0.229                      | 0.156     |
| 2       | 28.5  | 0.438    | 593            | 0.236                      | 0.276     |
| 2       | 32.5  | 0.049    | 830            | 0.228                      | 0.280     |
| 1       | 5.5   | 0.752    | 297            | 0.264                      | 0.187     |
| 1       | 11.5  | 0.686    | 369            | 0.252                      | 0.218     |
| 1       | 14.5  | 0.723    | 274            | 0.241                      | 0.166     |
| 1       | 18.5  | 0.771    | 254            | 0.263                      | 0.163     |
| 1       | 19.5  | 0.707    | 372            | 0.264                      | 0.225     |
| 1       | 22.5  | 0.774    | 234            | 0.260                      | 0.150     |
| 1       | 29.5  | 0.003    | 938            | 0.275                      | 0.336     |

$$\langle E_f \rangle = 0.48 eV, \nu_f=3, J_f=1.5:$$

| $\nu_f$ | $J_f$ | $\gamma$ | $\alpha$ (m/s) | $\langle E_f \rangle$ (eV) | FWHM (eV) |
|---------|-------|----------|----------------|----------------------------|-----------|
| 3       | 3.5   | 0.731    | 301            | 0.303                      | 0.205     |
| 3       | 5.5   | 0.744    | 302            | 0.313                      | 0.209     |
| 3       | 9.5   | 0.723    | 332            | 0.308                      | 0.225     |
| 3       | 10.5  | 0.716    | 325            | 0.301                      | 0.219     |
| 3       | 14.5  | 0.707    | 313            | 0.291                      | 0.207     |
| 3       | 16.5  | 0.700    | 311            | 0.285                      | 0.204     |
| 3       | 22.5  | 0.624    | 327            | 0.242                      | 0.193     |
| 3       | 26.5  | 0.629    | 302            | 0.237                      | 0.179     |
| 3       | 30.5  | 0.546    | 311            | 0.193                      | 0.162     |
| 3       | 32.5  | 0.555    | 289            | 0.191                      | 0.152     |
| 2       | 3.5   | 0.767    | 333            | 0.340                      | 0.238     |
| 2       | 5.5   | 0.761    | 343            | 0.340                      | 0.245     |
| 2       | 10.5  | 0.753    | 331            | 0.330                      | 0.234     |
| 2       | 14.5  | 0.723    | 359            | 0.318                      | 0.245     |
| 2       | 16.5  | 0.727    | 326            | 0.309                      | 0.222     |
| 2       | 18.5  | 0.724    | 357            | 0.317                      | 0.244     |
| 2       | 22.5  | 0.718    | 329            | 0.304                      | 0.222     |
| 2       | 23.5  | 0.710    | 338            | 0.302                      | 0.226     |
| 2       | 28.5  | 0.666    | 316            | 0.265                      | 0.198     |
| 2       | 32.5  | 0.624    | 333            | 0.244                      | 0.197     |
| 1       | 5.5   | 0.800    | 331            | 0.364                      | 0.247     |
| 1       | 11.5  | 0.782    | 336            | 0.353                      | 0.246     |
| 1       | 14.5  | 0.752    | 350            | 0.335                      | 0.247     |
| 1       | 18.5  | 0.771    | 353            | 0.350                      | 0.255     |
| 1       | 19.5  | 0.767    | 351            | 0.346                      | 0.253     |
| 1       | 22.5  | 0.745    | 351            | 0.331                      | 0.246     |
| 1       | 28.5  | 0.685    | 358            | 0.292                      | 0.232     |
| 1       | 29.5  | 0.727    | 342            | 0.315                      | 0.234     |

$$\langle E_f \rangle = 0.52eV, \nu_i=3, J_i=1.5:$$

| $\nu_f$ | $J_f$ | $\gamma$ | $\alpha$ (m/s) | $\langle E_f \rangle$ (eV) | FWHM (eV) |
|---------|-------|----------|----------------|----------------------------|-----------|
| 3       | 3.5   | 0.704    | 301            | 0.306                      | 0.206     |
| 3       | 5.5   | 0.726    | 287            | 0.319                      | 0.202     |
| 3       | 9.5   | 0.717    | 293            | 0.313                      | 0.204     |
| 3       | 10.5  | 0.671    | 301            | 0.282                      | 0.197     |
| 3       | 12.5  | 0.705    | 295            | 0.305                      | 0.202     |
| 3       | 14.5  | 0.696    | 293            | 0.298                      | 0.198     |
| 3       | 16.5  | 0.704    | 259            | 0.293                      | 0.176     |
| 3       | 26.5  | 0.638    | 271            | 0.251                      | 0.168     |
| 3       | 30.5  | 0.560    | 281            | 0.205                      | 0.155     |
| 3       | 32.5  | 0.557    | 271            | 0.200                      | 0.148     |
| 2       | 3.5   | 0.756    | 299            | 0.345                      | 0.219     |
| 2       | 5.5   | 0.764    | 275            | 0.344                      | 0.203     |
| 2       | 10.5  | 0.751    | 295            | 0.339                      | 0.214     |
| 2       | 14.5  | 0.726    | 294            | 0.320                      | 0.207     |
| 2       | 16.5  | 0.718    | 294            | 0.314                      | 0.205     |
| 2       | 18.5  | 0.748    | 290            | 0.336                      | 0.210     |
| 2       | 22.5  | 0.692    | 284            | 0.292                      | 0.191     |
| 2       | 23.5  | 0.707    | 289            | 0.304                      | 0.198     |
| 2       | 28.5  | 0.654    | 290            | 0.267                      | 0.185     |
| 2       | 32.5  | 0.624    | 293            | 0.248                      | 0.179     |
| 1       | 5.5   | 0.776    | 297            | 0.360                      | 0.223     |
| 1       | 11.5  | 0.775    | 287            | 0.356                      | 0.215     |
| 1       | 14.5  | 0.749    | 311            | 0.344                      | 0.227     |
| 1       | 18.5  | 0.762    | 299            | 0.350                      | 0.221     |
| 1       | 19.5  | 0.754    | 307            | 0.346                      | 0.224     |
| 1       | 22.5  | 0.734    | 303            | 0.329                      | 0.216     |
| 1       | 29.5  | 0.688    | 286            | 0.289                      | 0.191     |

$$\langle E_f \rangle = 0.58eV, \nu_i=3, J_i=1.5:$$

| $\nu_f$ | $J_f$ | $\gamma$ | $\alpha$ (m/s) | $\langle E_f \rangle$ (eV) | FWHM (eV) |
|---------|-------|----------|----------------|----------------------------|-----------|
| 3       | 3.5   | 0.752    | 276            | 0.370                      | 0.212     |
| 3       | 5.5   | 0.749    | 292            | 0.372                      | 0.224     |
| 3       | 9.5   | 0.743    | 293            | 0.367                      | 0.223     |
| 3       | 10.5  | 0.745    | 281            | 0.366                      | 0.214     |
| 3       | 14.5  | 0.722    | 296            | 0.350                      | 0.219     |
| 3       | 16.5  | 0.728    | 273            | 0.348                      | 0.202     |
| 3       | 22.5  | 0.667    | 300            | 0.307                      | 0.206     |
| 3       | 26.5  | 0.674    | 265            | 0.302                      | 0.182     |
| 3       | 30.5  | 0.617    | 267            | 0.260                      | 0.169     |
| 3       | 32.5  | 0.616    | 263            | 0.258                      | 0.166     |
| 2       | 3.5   | 0.774    | 334            | 0.408                      | 0.265     |
| 2       | 5.5   | 0.782    | 312            | 0.408                      | 0.250     |
| 2       | 10.5  | 0.768    | 322            | 0.399                      | 0.254     |
| 2       | 14.5  | 0.750    | 320            | 0.382                      | 0.246     |
| 2       | 16.5  | 0.743    | 318            | 0.375                      | 0.242     |
| 2       | 18.5  | 0.753    | 327            | 0.387                      | 0.253     |
| 2       | 22.5  | 0.730    | 324            | 0.366                      | 0.243     |
| 2       | 23.5  | 0.727    | 310            | 0.359                      | 0.231     |
| 2       | 28.5  | 0.679    | 296            | 0.315                      | 0.207     |
| 2       | 32.5  | 0.649    | 292            | 0.290                      | 0.195     |
| 1       | 5.5   | 0.824    | 282            | 0.438                      | 0.237     |
| 1       | 11.5  | 0.813    | 295            | 0.432                      | 0.244     |
| 1       | 14.5  | 0.786    | 320            | 0.415                      | 0.258     |
| 1       | 18.5  | 0.790    | 331            | 0.422                      | 0.268     |
| 1       | 19.5  | 0.792    | 313            | 0.418                      | 0.254     |
| 1       | 22.5  | 0.764    | 323            | 0.395                      | 0.253     |
| 1       | 28.5  | 0.705    | 315            | 0.342                      | 0.228     |
| 1       | 29.5  | 0.732    | 334            | 0.372                      | 0.252     |

$$\langle E_f \rangle = 0.64eV, \nu_i=3, J_i=1.5:$$

| $\nu_f$ | $J_f$ | $\gamma$ | $\alpha$ (m/s) | $\langle E_f \rangle$ (eV) | FWHM (eV) |
|---------|-------|----------|----------------|----------------------------|-----------|
| 3       | 3.5   | 0.726    | 287            | 0.378                      | 0.222     |
| 3       | 5.5   | 0.722    | 300            | 0.379                      | 0.232     |
| 3       | 9.5   | 0.713    | 295            | 0.370                      | 0.225     |
| 3       | 10.5  | 0.723    | 286            | 0.375                      | 0.220     |
| 3       | 14.5  | 0.707    | 290            | 0.362                      | 0.219     |
| 3       | 16.5  | 0.701    | 290            | 0.357                      | 0.217     |
| 3       | 22.5  | 0.646    | 304            | 0.314                      | 0.211     |
| 3       | 26.5  | 0.654    | 271            | 0.310                      | 0.189     |
| 3       | 30.5  | 0.604    | 279            | 0.273                      | 0.181     |
| 3       | 32.5  | 0.601    | 273            | 0.269                      | 0.176     |
| 2       | 3.5   | 0.757    | 308            | 0.414                      | 0.249     |
| 2       | 5.5   | 0.753    | 306            | 0.410                      | 0.246     |
| 2       | 10.5  | 0.750    | 303            | 0.406                      | 0.242     |
| 2       | 14.5  | 0.724    | 323            | 0.389                      | 0.251     |
| 2       | 16.5  | 0.729    | 300            | 0.385                      | 0.233     |
| 2       | 18.5  | 0.722    | 319            | 0.385                      | 0.246     |
| 2       | 22.5  | 0.709    | 317            | 0.373                      | 0.241     |
| 2       | 23.5  | 0.698    | 307            | 0.360                      | 0.230     |
| 2       | 28.5  | 0.653    | 311            | 0.322                      | 0.218     |
| 2       | 32.5  | 0.610    | 371            | 0.309                      | 0.247     |
| 1       | 5.5   | 0.781    | 296            | 0.434                      | 0.246     |
| 1       | 11.5  | 0.775    | 312            | 0.433                      | 0.258     |
| 1       | 14.5  | 0.761    | 311            | 0.419                      | 0.252     |
| 1       | 18.5  | 0.760    | 327            | 0.424                      | 0.266     |
| 1       | 19.5  | 0.769    | 305            | 0.425                      | 0.250     |
| 1       | 22.5  | 0.736    | 306            | 0.394                      | 0.240     |
| 1       | 28.5  | 0.677    | 329            | 0.348                      | 0.240     |
| 1       | 29.5  | 0.687    | 319            | 0.354                      | 0.235     |

$$\langle E_f \rangle = 0.84eV, \nu_i=3, J_i=1.5:$$

| $\nu_f$ | $J_f$ | $\gamma$ | $\alpha$ (m/s) | $\langle E_f \rangle$ (eV) | FWHM (eV) |
|---------|-------|----------|----------------|----------------------------|-----------|
| 3       | 3.5   | 0.732    | 291            | 0.493                      | 0.259     |
| 3       | 5.5   | 0.694    | 357            | 0.471                      | 0.304     |
| 3       | 9.5   | 0.713    | 323            | 0.481                      | 0.282     |
| 3       | 10.5  | 0.730    | 290            | 0.490                      | 0.258     |
| 3       | 14.5  | 0.707    | 309            | 0.469                      | 0.267     |
| 3       | 16.5  | 0.713    | 287            | 0.469                      | 0.249     |
| 3       | 22.5  | 0.657    | 327            | 0.417                      | 0.263     |
| 3       | 26.5  | 0.662    | 295            | 0.412                      | 0.238     |
| 3       | 30.5  | 0.627    | 287            | 0.373                      | 0.220     |
| 3       | 32.5  | 0.626    | 283            | 0.370                      | 0.217     |
| 2       | 3.5   | 0.752    | 328            | 0.530                      | 0.301     |
| 2       | 5.5   | 0.750    | 331            | 0.528                      | 0.303     |
| 2       | 10.5  | 0.747    | 318            | 0.520                      | 0.290     |
| 2       | 14.5  | 0.737    | 339            | 0.515                      | 0.306     |
| 2       | 16.5  | 0.739    | 306            | 0.506                      | 0.275     |
| 2       | 18.5  | 0.732    | 335            | 0.508                      | 0.300     |
| 2       | 22.5  | 0.721    | 329            | 0.492                      | 0.290     |
| 2       | 23.5  | 0.710    | 324            | 0.478                      | 0.282     |
| 2       | 28.5  | 0.672    | 311            | 0.428                      | 0.256     |
| 2       | 32.5  | 0.656    | 277            | 0.400                      | 0.222     |
| 1       | 5.5   | 0.789    | 292            | 0.565                      | 0.280     |
| 1       | 11.5  | 0.782    | 276            | 0.552                      | 0.262     |
| 1       | 14.5  | 0.772    | 295            | 0.544                      | 0.277     |
| 1       | 18.5  | 0.771    | 300            | 0.544                      | 0.281     |
| 1       | 19.5  | 0.774    | 314            | 0.553                      | 0.296     |
| 1       | 22.5  | 0.747    | 321            | 0.521                      | 0.292     |
| 1       | 28.5  | 0.694    | 322            | 0.458                      | 0.273     |
| 1       | 29.5  | 0.707    | 329            | 0.475                      | 0.285     |



$$\langle E_f \rangle = 0.98 eV, \nu_f=3, J_f=1.5:$$

| $\nu_f$ | $J_f$ | $\gamma$ | $\alpha$ (m/s) | $\langle E_f \rangle$ (eV) | FWHM (eV) |
|---------|-------|----------|----------------|----------------------------|-----------|
| 3       | 3.5   | 0.727    | 323            | 0.575                      | 0.310     |
| 3       | 5.5   | 0.681    | 415            | 0.547                      | 0.378     |
| 3       | 9.5   | 0.726    | 334            | 0.578                      | 0.321     |
| 3       | 10.5  | 0.729    | 318            | 0.575                      | 0.306     |
| 3       | 14.5  | 0.717    | 319            | 0.560                      | 0.302     |
| 3       | 16.5  | 0.719    | 312            | 0.560                      | 0.296     |
| 3       | 22.5  | 0.673    | 338            | 0.506                      | 0.302     |
| 3       | 26.5  | 0.678    | 316            | 0.505                      | 0.284     |
| 3       | 30.5  | 0.635    | 336            | 0.456                      | 0.283     |
| 3       | 32.5  | 0.645    | 308            | 0.459                      | 0.263     |
| 2       | 3.5   | 0.769    | 351            | 0.646                      | 0.357     |
| 2       | 5.5   | 0.775    | 339            | 0.651                      | 0.347     |
| 2       | 10.5  | 0.764    | 345            | 0.637                      | 0.349     |
| 2       | 14.5  | 0.758    | 343            | 0.628                      | 0.344     |
| 2       | 16.5  | 0.757    | 332            | 0.622                      | 0.332     |
| 2       | 18.5  | 0.758    | 348            | 0.630                      | 0.349     |
| 2       | 22.5  | 0.742    | 355            | 0.608                      | 0.349     |
| 2       | 23.5  | 0.734    | 345            | 0.593                      | 0.335     |
| 2       | 28.5  | 0.694    | 331            | 0.532                      | 0.304     |
| 2       | 32.5  | 0.665    | 336            | 0.495                      | 0.297     |
| 1       | 5.5   | 0.806    | 308            | 0.689                      | 0.327     |
| 1       | 11.5  | 0.801    | 313            | 0.683                      | 0.330     |
| 1       | 14.5  | 0.793    | 292            | 0.664                      | 0.304     |
| 1       | 18.5  | 0.793    | 316            | 0.671                      | 0.331     |
| 1       | 19.5  | 0.793    | 304            | 0.668                      | 0.317     |
| 1       | 22.5  | 0.783    | 306            | 0.653                      | 0.316     |
| 1       | 28.5  | 0.716    | 350            | 0.569                      | 0.333     |
| 1       | 29.5  | 0.734    | 372            | 0.604                      | 0.363     |
